# Supplementary material for: Multi-ancestry meta-analysis of host genetic susceptibility to tuberculosis identifies shared genetic architecture
Source: eLife. 2024 Jan 15;13:e84394. doi: 10.7554/eLife.84394 (PMC10789494; doi:10.7554/eLife.84394)
Supplement: Figure 1—figure supplement 2—source data 1. [file elife-84394-fig1-figsupp2-data1.xlsx]

## Sheet: Sheet1
P-value bins	Probability
1	0.0461091
2	0.0481171
3	0.0457668
4	0.0624836
5	0.0690399
6	0.0166667
7	0.0454545
8	0
9	0
10	NA
11	0
