# Supplementary material for: Multi-ancestry meta-analysis of host genetic susceptibility to tuberculosis identifies shared genetic architecture
Source: eLife. 2024 Jan 15;13:e84394. doi: 10.7554/eLife.84394 (PMC10789494; doi:10.7554/eLife.84394)
Supplement: Figure 1—figure supplement 3—source data 1. [file elife-84394-fig1-figsupp3-data1.xlsx]

## Sheet: rs4576509_chr9_forest_pc2
Figure 1 figure supplement 3 forest plot data for rs4576509
Cohort	MARKERNAME	EA	NEA	OR	OR_95L	OR_95U	EAF	N	CHROMOSOME	POSITION
China1	rs4576509:23294037:C:G	G	C	1.13957	0.774984	1.67567	0.887086	1070	9	23294037
China2	rs4576509:23294037:C:G	G	C	1.05026	0.885505	1.24568	0.86492	2390	9	23294037
China3	rs4576509:23294037:C:G	G	C	1.23752	1.03825	1.47504	0.87638	2509	9	23294037
Thailand	rs4576509:23294037:C:G	G	C	1.053	0.847795	1.30787	0.833	1431	9	23294037
Japan	rs4576509:23294037:C:G	G	C	1.09417	0.939056	1.27492	0.809	3950	9	23294037
Russia	rs4576509:23294037:C:G	G	C	0.877981	0.825819	0.933439	0.68022	11445	9	23294037
Estonia	rs4576509:23294037:C:G	G	C	0.992776	0.815834	1.20809	0.64212	7285	9	23294037
Germany	rs4576509:23294037:C:G	G	C	0.827745	0.667354	1.02668	0.6849	919	9	23294037
Gambia	rs4576509:23294037:C:G	G	C	0.762312	0.628031	0.925303	0.90636	2698	9	23294037
Ghana	rs4576509:23294037:C:G	G	C	0.908264	0.719439	1.14665	0.95056	3311	9	23294037
SAC_A	rs4576509:23294037:C:G	G	C	1.51676	0.952381	2.41488	0.8473	501	9	23294037
SAC_M	rs4576509:23294037:C:G	G	C	1.03734	0.762777	1.41084	0.8577	699	9	23294037
Meta_analysis	rs4576509:23294037:C:G	G	C	0.934624	0.893606	0.977525	0.76437	37008	9	23294037
Figure 1 figure supplement 3 forest plot data for rs6477824
Cohort	MARKERNAME	EA	NEA	OR	OR_95L	OR_95U	EAF	N	CHROMOSOME	POSITION
China1	rs6477824:114287453:T:C	C	T	0.927126	0.718803	1.19583	0.668941	1070	9	114287453
China2	rs6477824:114287453:T:C	C	T	0.915074	0.805662	1.03935	0.66694	2389	9	114287453
China3	rs6477824:114287453:T:C	C	T	0.87713	0.774513	0.993343	0.67742	2508	9	114287453
Thailand	rs6477824:114287453:T:C	C	T	0.862	0.723904	1.02644	0.7183	1431	9	114287453
Japan	rs6477824:114287453:T:C	C	T	0.895834	0.794883	1.00961	0.6055	3950	9	114287453
Russia	rs6477824:114287453:T:C	C	T	1.10607	1.0387	1.1778	0.74249	11445	9	114287453
Estonia	rs6477824:114287453:T:C	C	T	1.12358	0.902039	1.39953	0.76522	7286	9	114287453
Germany	rs6477824:114287453:T:C	C	T	1.04077	0.826192	1.31108	0.73939	919	9	114287453
Gambia	rs6477824:114287453:T:C	C	T	0.826149	0.68761	0.992602	0.89787	2698	9	114287453
Ghana	rs6477824:114287453:T:C	C	T	0.827538	0.713275	0.960105	0.86521	3311	9	114287453
SAC_A	rs6477824:114287453:T:C	C	T	1.30736	0.848896	2.01329	0.8336	529	9	114287453
SAC_M	rs6477824:114287453:T:C	C	T	1.05775	0.809717	1.38198	0.8132	728	9	114287453
Meta_analysis	rs6477824:114287453:T:C	C	T	0.978696	0.939915	1.01908	0.742225	37007	9	114287453
