# Supplementary material for: Multi-ancestry meta-analysis of host genetic susceptibility to tuberculosis identifies shared genetic architecture
Source: eLife. 2024 Jan 15;13:e84394. doi: 10.7554/eLife.84394 (PMC10789494; doi:10.7554/eLife.84394)
Supplement: Figure 1—figure supplement 4—source data 1. [file elife-84394-fig1-figsupp4-data1.xlsx]

## Sheet: rs12362545_chr11_forest_pc2
Figure 1 figure supplement 4 rs12362545 forest plot
Cohort	MARKERNAME	EA	NEA	OR	OR_95L	OR_95U	EAF	N	CHROMOSOME	POSITION
China1	rs12362545:7573173:G:T	T	G	1.36359	0.889589	2.09016	0.0946392	1070	11	7573173
China2	rs12362545:7573173:G:T	T	G	1.00159	0.827251	1.21267	0.10252	2390	11	7573173
China3	rs12362545:7573173:G:T	T	G	1.01705	0.828218	1.24894	0.09519	2509	11	7573173
Thailand	rs12362545:7573173:G:T	T	G	0.905797	0.679823	1.20689	0.0747	1431	11	7573173
Japan	rs12362545:7573173:G:T	T	G	1.05548	0.803772	1.38603	0.0492	3950	11	7573173
Russia	rs12362545:7573173:G:T	T	G	1.32983	1.17683	1.50272	0.05477	11444	11	7573173
Estonia	rs12362545:7573173:G:T	T	G	1.5672	1.04484	2.35071	0.05572	7286	11	7573173
Germany	rs12362545:7573173:G:T	T	G	1.40856	0.974614	2.03573	0.07781	919	11	7573173
Gambia	rs12362545:7573173:G:T	T	G	1.21025	1.0088	1.45193	0.12298	2698	11	7573173
Ghana	rs12362545:7573173:G:T	T	G	0.997882	0.863004	1.15384	0.14835	3311	11	7573173
SAC_A	rs12362545:7573173:G:T	T	G	1.207	0.6566	2.22	0.1024	508	11	7573173
SAC_M	rs12362545:7573173:G:T	T	G	1.05	0.7778	1.418	0.1684	692	11	7573173
Meta_analysis	rs12362545:7573173:G:T	T	G	1.13758	1.06835	1.21128	0.07805	38207	11	7573173
