# Supplementary material for: Multi-ancestry meta-analysis of host genetic susceptibility to tuberculosis identifies shared genetic architecture
Source: eLife. 2024 Jan 15;13:e84394. doi: 10.7554/eLife.84394 (PMC10789494; doi:10.7554/eLife.84394)
Supplement: Figure 1—figure supplement 5—source data 1. [file elife-84394-fig1-figsupp5-data1.xlsx]

## Sheet: rs35787595_chr16_forest_pc2
Figure 1 figure supplement 5 rs35787595 forest plot
Cohort	MARKERNAME	EA	NEA	OR	OR_95L	OR_95U	EAF	N	CHROMOSOME	POSITION
China1	rs35787595:75466847:G:C	C	G	NA	NA	NA	NA	NA	16	75466847
China2	rs35787595:75466847:G:C	C	G	NA	NA	NA	NA	NA	16	75466847
China3	rs35787595:75466847:G:C	C	G	0.873393	0.776232	0.982714	0.491	2509	16	75466847
Thailand	rs35787595:75466847:G:C	C	G	0.864305	0.739061	1.01077	0.527	1431	16	75466847
Japan	rs35787595:75466847:G:C	C	G	0.926816	0.823987	1.04248	0.4946	3950	16	75466847
Russia	rs35787595:75466847:G:C	C	G	0.886548	0.837283	0.938712	0.61477	11445	16	75466847
Estonia	rs35787595:75466847:G:C	C	G	0.970708	0.804151	1.17176	0.58389	7286	16	75466847
Germany	rs35787595:75466847:G:C	C	G	NA	NA	NA	NA	NA	16	75466847
Gambia	rs35787595:75466847:G:C	C	G	1.09898	0.972481	1.24193	0.28848	2698	16	75466847
Ghana	rs35787595:75466847:G:C	C	G	1.0179	0.902643	1.14787	0.23317	3311	16	75466847
SAC_A	rs35787595:75466847:G:C	C	G	0.7372	0.5137	1.058	0.4011	526	16	75466847
SAC_M	rs35787595:75466847:G:C	C	G	0.9558	0.7703	1.186	0.4247	717	16	75466847
Meta_analysis	rs35787595:75466847:G:C	C	G	0.923357	0.888713	0.959351	0.510608	33873	16	75466847
