# Supplementary material for: Multi-ancestry meta-analysis of host genetic susceptibility to tuberculosis identifies shared genetic architecture
Source: eLife. 2024 Jan 15;13:e84394. doi: 10.7554/eLife.84394 (PMC10789494; doi:10.7554/eLife.84394)
Supplement: Figure 3—figure supplement 1—source data 1. [file elife-84394-fig3-figsupp1-data1.xlsx]

## Sheet: Sheet1
Conditioned								Un-conditioned
RSID	STUDY	PVALUE_FE	BETA_FE	STD_FE	PVALUE_RE			RSID	STUDY	PVALUE_FE	BETA_FE	STD_FE	PVALUE_RE
HLA_A*01:01	3	0.948383	0.00311249	0.0480784	0.381135			HLA_A*01:01	4	0.940861	-0.00282256	0.0380464	0.376933
HLA_A*02:01	6	0.31265	0.0287324	0.028457	0.31265			HLA_A*02:01	8	0.806461	0.0059331	0.0242173	0.806461
HLA_A*02:02	1	NA	NA	NA	NA			HLA_A*02:02	1	NA	NA	NA	NA
HLA_A*02:06	1	NA	NA	NA	NA			HLA_A*02:06	2	0.249851	-0.119089	0.103492	0.249851
HLA_A*02:07	1	NA	NA	NA	NA			HLA_A*02:07	2	0.775049	0.0293533	0.102714	0.775049
HLA_A*03:01	4	0.441489	0.0276745	0.0359559	0.441489			HLA_A*03:01	6	0.145409	0.0456797	0.0313747	0.258679
HLA_A*11:01	4	0.397911	0.0483209	0.0571602	0.529441			HLA_A*11:01	5	0.233887	0.0493664	0.0414702	0.233887
HLA_A*23:01	3	0.289001	-0.0589635	0.0556094	0.289001			HLA_A*23:01	4	0.332474	-0.0517313	0.0533785	0.804749
HLA_A*24:02	4	0.997448	-0.00014088	0.0440546	0.997448			HLA_A*24:02	6	0.410538	0.0288122	0.0350111	0.410538
HLA_A*26:01	2	0.430461	-0.0761414	0.0965767	0.449124			HLA_A*26:01	3	0.569193	-0.0523521	0.0919683	0.486771
HLA_A*30:01	2	0.177132	0.100526	0.0744838	0.177132			HLA_A*30:01	3	0.60702	0.0350105	0.0680699	0.71215
HLA_A*30:02	2	0.960473	-0.00364933	0.0736347	0.944168			HLA_A*30:02	3	0.837635	-0.0144586	0.0705573	0.826155
HLA_A*33:01	1	NA	NA	NA	NA			HLA_A*33:01	1	NA	NA	NA	NA
HLA_A*33:03	3	0.811633	0.0163243	0.0684972	0.811633			HLA_A*33:03	4	0.905209	0.0077499	0.0650796	0.905209
HLA_A*68:02	2	0.912544	-0.0079742	0.072605	0.912544			HLA_A*68:01	1	NA	NA	NA	NA
HLA_A*74:01	1	NA	NA	NA	NA			HLA_A*68:02	3	0.588136	0.0362437	0.0669271	0.588136
HLA_B*07:02	5	0.569694	-0.0204235	0.0359251	0.569694			HLA_A*74:01	1	NA	NA	NA	NA
HLA_B*08:01	2	0.791566	0.0165575	0.0626519	0.791566			HLA_B*07:02	6	0.985522	-0.000599673	0.0330468	0.985522
HLA_B*13:01	1	NA	NA	NA	NA			HLA_B*08:01	2	0.0866368	0.0889895	0.051937	0.0866368
HLA_B*15:01	4	0.41886	0.0465167	0.0575416	0.41886			HLA_B*13:02	2	0.0141963	-0.139832	0.0570219	0.232011
HLA_B*15:03	2	0.612628	-0.0402346	0.0794639	0.734688			HLA_B*15:01	5	0.172741	0.0644909	0.0472998	0.395091
HLA_B*15:10	2	0.315771	0.0709899	0.0707644	0.40436			HLA_B*15:03	2	0.896578	-0.0099232	0.0763412	0.876198
HLA_B*18:01	3	0.0759356	-0.098116	0.0552837	0.12607			HLA_B*15:10	2	0.28824	0.0725802	0.0683436	0.28824
HLA_B*35:01	4	0.385898	0.0348004	0.0401351	0.385898			HLA_B*18:01	3	0.0148077	-0.115856	0.0475395	0.729536
HLA_B*40:01	1	NA	NA	NA	NA			HLA_B*35:01	5	0.360993	0.0336885	0.0368796	0.360993
HLA_B*40:06	1	NA	NA	NA	NA			HLA_B*40:01	2	0.210422	-0.132588	0.105867	0.210422
HLA_B*42:01	2	0.865698	-0.0131816	0.0779397	0.865698			HLA_B*40:06	1	NA	NA	NA	NA
HLA_B*44:02	2	0.000334275	0.199526	0.0556218	0.000334275			HLA_B*42:01	2	0.811478	0.0176106	0.0738331	0.811478
HLA_B*44:03	2	0.132433	0.152005	0.101028	0.132433			HLA_B*44:02	2	0.00429096	0.145673	0.0510071	0.00429096
HLA_B*45:01	1	NA	NA	NA	NA			HLA_B*44:03	3	0.475099	0.0682045	0.0954967	0.475099
HLA_B*46:01	1	NA	NA	NA	NA			HLA_B*45:01	1	NA	NA	NA	NA
HLA_B*49:01	1	NA	NA	NA	NA			HLA_B*46:01	2	0.879228	0.013846	0.091123	0.789083
HLA_B*51:01	3	0.694063	-0.0242229	0.0615815	0.532873			HLA_B*49:01	1	NA	NA	NA	NA
HLA_B*52:01	2	0.419537	0.064238	0.0795788	0.419537			HLA_B*51:01	4	0.566914	0.0499382	0.0872127	0.548584
HLA_B*53:01	2	0.423288	-0.0433442	0.0541309	0.496831			HLA_B*52:01	2	0.432344	0.0596845	0.076013	0.432344
HLA_B*58:01	1	NA	NA	NA	NA			HLA_B*53:01	2	0.328899	-0.0506216	0.0518487	0.407079
HLA_B*58:02	1	NA	NA	NA	NA			HLA_B*58:01	1	NA	NA	NA	NA
HLA_C*01:02	1	NA	NA	NA	NA			HLA_B*58:02	2	0.555867	0.119645	0.203135	0.555867
HLA_C*02:02	5	0.880494	-0.00662655	0.0440763	0.897158			HLA_C*01:02	2	0.835489	0.0152922	0.073638	0.835489
HLA_C*03:03	3	0.615918	0.0320607	0.0639114	0.85422			HLA_C*02:02	5	0.768837	-0.012029	0.0409294	0.844252
HLA_C*03:04	3	0.0765476	0.102486	0.0578667	0.0765476			HLA_C*03:03	3	0.111559	-0.144126	0.0905758	0.125591
HLA_C*04:01	6	0.106138	0.049694	0.0307551	0.248101			HLA_C*03:04	4	0.2664	0.0527765	0.0474869	0.523366
HLA_C*05:01	1	NA	NA	NA	NA			HLA_C*04:01	8	0.227286	0.0323126	0.0267626	0.294048
HLA_C*06:02	5	0.715283	-0.0171656	0.0470586	0.847796			HLA_C*05:01	1	NA	NA	NA	NA
HLA_C*07:01	5	0.348413	0.0347624	0.0370731	0.32298			HLA_C*06:02	7	0.0587519	-0.0652496	0.0345228	0.266419
HLA_C*07:02	5	0.275165	-0.039768	0.0364428	0.275165			HLA_C*07:01	6	0.344404	0.0306633	0.0324308	0.344404
HLA_C*08:01	1	NA	NA	NA	NA			HLA_C*07:02	7	0.877654	-0.00477354	0.0310083	0.877654
HLA_C*12:03	2	0.15184	-0.0685082	0.0478054	0.15184			HLA_C*08:01	2	0.202584	0.119532	0.0938074	0.216125
HLA_C*14:02	2	0.135196	-0.157881	0.105682	0.271608			HLA_C*12:03	2	0.0575125	-0.0818644	0.0431003	0.0575125
HLA_C*16:01	2	0.408996	-0.0451651	0.0547017	0.408996			HLA_C*14:02	2	0.886474	-0.0120515	0.0844132	0.886474
HLA_C*17:01	3	0.457354	-0.0533921	0.0718397	0.448199			HLA_C*16:01	2	0.293616	-0.0551227	0.0524867	0.293616
HLA_DPB1*01:01	4	0.612937	-0.0199454	0.0394267	0.612937			HLA_C*17:01	4	0.682747	-0.0279151	0.0682992	0.579651
HLA_DPB1*02:01	6	0.057135	0.0612186	0.0321817	0.258			HLA_DPB1*01:01	4	0.217928	-0.0472064	0.0383151	0.217928
HLA_DPB1*03:01	2	0.766838	0.0146341	0.0493541	0.766838			HLA_DPB1*02:01	8	0.130763	0.0408319	0.0270213	0.305893
HLA_DPB1*04:01	4	0.522646	-0.0181394	0.0283751	0.889852			HLA_DPB1*02:02	2	0.343598	0.116408	0.122912	0.738562
HLA_DPB1*04:02	2	0.459045	-0.0311422	0.0420601	0.459045			HLA_DPB1*03:01	2	0.919872	-0.0043873	0.0436135	0.919872
HLA_DPB1*05:01	1	NA	NA	NA	NA			HLA_DPB1*04:01	6	0.273929	0.026037	0.0237985	0.273929
HLA_DPB1*06:02	3	0.379053	-0.0528913	0.0601281	0.379053			HLA_DPB1*04:02	3	0.11386	-0.0538365	0.0340505	0.11386
HLA_DPB1*13:01	1	NA	NA	NA	NA			HLA_DPB1*05:01	2	0.195068	0.0730736	0.0563957	0.351919
HLA_DPB1*17:01	2	0.963439	0.00298697	0.0651629	0.963439			HLA_DPB1*06:02	4	0.791041	0.0152237	0.0574568	0.63549
HLA_DQA1*01:01	5	0.163816	-0.0507306	0.0364352	0.704159			HLA_DPB1*13:01	3	0.530193	0.0654182	0.104217	0.530193
HLA_DQA1*01:02	6	0.0438063	0.0526106	0.0260973	0.221556			HLA_DPB1*17:01	2	0.757646	-0.0193067	0.0625675	0.875292
HLA_DQA1*01:03	5	0.954753	0.00245071	0.0431925	0.954753			HLA_DQA1*01:01	6	0.0775338	-0.058316	0.0330369	0.704919
HLA_DQA1*02:01	5	0.163816	-0.0654377	0.046998	0.848791			HLA_DQA1*01:02	8	0.0135796	0.057918	0.0234657	0.0135796
HLA_DQA1*03:01	4	0.0452636	0.097686	0.0487894	0.0452636			HLA_DQA1*01:03	7	0.0804072	0.0640126	0.0366136	0.14064
HLA_DQA1*03:02	1	NA	NA	NA	NA			HLA_DQA1*01:04	1	NA	NA	NA	NA
HLA_DQA1*03:03	3	0.0972973	-0.153233	0.0924148	0.0972973			HLA_DQA1*02:01	8	3.20875e-05	-0.127814	0.0307385	0.0287346
HLA_DQA1*04:01	3	0.009092	-0.155334	0.0595476	0.0470162			HLA_DQA1*03:01	6	0.0127075	0.104406	0.0418988	0.0127075
HLA_DQA1*05:01	5	0.831049	0.00777254	0.0364298	0.831049			HLA_DQA1*03:02	2	0.0198712	-0.182401	0.0783249	0.0198712
HLA_DQA1*05:05	5	0.362317	-0.0314356	0.0345083	0.39236			HLA_DQA1*03:03	4	0.878477	0.0107024	0.0699962	0.666631
HLA_DQA1*06:01	1	NA	NA	NA	NA			HLA_DQA1*04:01	3	0.00834798	-0.149817	0.056799	0.00834798
HLA_DQB1*02:01	4	0.928963	0.00421691	0.0473013	0.928963			HLA_DQA1*05:01	6	0.442902	0.0250731	0.032677	0.442902
HLA_DQB1*02:02	3	0.685367	-0.0280647	0.0692696	0.749222			HLA_DQA1*05:05	7	0.103482	-0.0476787	0.029283	0.390616
HLA_DQB1*03:01	6	0.372511	-0.0241243	0.0270518	0.976427			HLA_DQA1*06:01	2	0.86378	-0.0168693	0.0983264	0.86378
HLA_DQB1*03:02	4	0.0266167	0.104614	0.0471851	0.0266167			HLA_DQB1*02:01	5	0.315104	0.0408301	0.0406444	0.315104
HLA_DQB1*03:03	1	NA	NA	NA	NA			HLA_DQB1*02:02	8	0.000867476	-0.112656	0.0338275	0.134642
HLA_DQB1*04:01	1	NA	NA	NA	NA			HLA_DQB1*03:01	8	0.402169	-0.019511	0.0232897	0.840397
HLA_DQB1*04:02	2	5.02434e-05	-0.35011	0.0863511	5.02434e-05			HLA_DQB1*03:02	6	0.00342404	0.119774	0.0409222	0.00342404
HLA_DQB1*05:01	5	0.289869	-0.0341408	0.0322567	0.649039			HLA_DQB1*03:03	3	0.0271813	-0.102445	0.0463783	0.0271813
HLA_DQB1*05:02	2	0.0116986	0.157224	0.0623629	0.729917			HLA_DQB1*04:02	2	0.000211756	-0.305789	0.082544	0.000211756
HLA_DQB1*06:01	1	NA	NA	NA	NA			HLA_DQB1*05:01	7	0.134465	-0.0428057	0.0285996	0.428799
HLA_DQB1*06:02	6	0.342505	0.0297795	0.0313723	0.55504			HLA_DQB1*05:02	3	0.0148548	0.128899	0.0529163	0.199431
HLA_DQB1*06:03	3	0.548167	0.0314987	0.0524533	0.927241			HLA_DQB1*05:03	1	NA	NA	NA	NA
HLA_DRB1*01:01	2	0.0328922	-0.0975097	0.0457063	0.0328922			HLA_DQB1*06:01	2	0.0104661	0.231759	0.0905296	0.635591
HLA_DRB1*01:02	1	NA	NA	NA	NA			HLA_DQB1*06:02	8	0.372316	0.0256549	0.0287564	0.991154
HLA_DRB1*03:01	3	0.583563	-0.0299803	0.0546899	0.583563			HLA_DQB1*06:03	4	0.275603	0.0529243	0.0485432	0.306595
HLA_DRB1*03:02	1	NA	NA	NA	NA			HLA_DRB1*01:01	2	0.0106677	-0.103203	0.0404178	0.0106677
HLA_DRB1*04:01	3	0.00210053	0.180934	0.0588283	0.165227			HLA_DRB1*01:02	1	NA	NA	NA	NA
HLA_DRB1*04:05	1	NA	NA	NA	NA			HLA_DRB1*03:01	4	0.548425	0.0272948	0.0454822	0.548425
HLA_DRB1*07:01	5	0.128236	-0.0708379	0.0465704	0.94018			HLA_DRB1*03:02	1	NA	NA	NA	NA
HLA_DRB1*08:04	1	NA	NA	NA	NA			HLA_DRB1*04:01	4	0.000440086	0.191797	0.0545685	0.759467
HLA_DRB1*09:01	2	0.196362	-0.125247	0.0969413	0.196362			HLA_DRB1*07:01	8	5.47706e-05	-0.123268	0.0305552	0.033277
HLA_DRB1*10:01	1	NA	NA	NA	NA			HLA_DRB1*08:03	2	0.153877	0.153369	0.107554	0.153877
HLA_DRB1*11:01	5	0.643164	0.019894	0.0429418	0.167093			HLA_DRB1*08:04	1	NA	NA	NA	NA
HLA_DRB1*11:02	1	NA	NA	NA	NA			HLA_DRB1*09:01	3	0.0264893	-0.139297	0.0627757	0.0264893
HLA_DRB1*12:02	1	NA	NA	NA	NA			HLA_DRB1*10:01	1	NA	NA	NA	NA
HLA_DRB1*13:01	5	0.372876	0.0376925	0.0422989	0.54903			HLA_DRB1*11:01	7	0.662376	-0.0163151	0.0373655	0.662376
HLA_DRB1*13:02	3	0.323452	-0.0695415	0.0704297	0.323452			HLA_DRB1*11:02	1	NA	NA	NA	NA
HLA_DRB1*15:01	4	0.488038	0.0270262	0.0389745	0.488038			HLA_DRB1*12:02	2	0.320306	-0.10074	0.101366	0.320306
HLA_DRB1*15:03	2	0.166734	0.0983064	0.0710935	0.166734			HLA_DRB1*13:01	6	0.112274	0.0628341	0.0395667	0.112274
HLA_DRB1*16:01	1	NA	NA	NA	NA			HLA_DRB1*13:02	4	0.94414	-0.00467489	0.0667199	0.94414
								HLA_DRB1*15:01	6	0.667152	0.0147911	0.034393	0.667152
								HLA_DRB1*15:03	3	0.273237	0.0746162	0.0681029	0.273237
