# Supplementary material for: Multi-ancestry meta-analysis of host genetic susceptibility to tuberculosis identifies shared genetic architecture
Source: eLife. 2024 Jan 15;13:e84394. doi: 10.7554/eLife.84394 (PMC10789494; doi:10.7554/eLife.84394)
Supplement: Figure 3—source data 1. [file elife-84394-fig3-data1.xlsx]

## Sheet: Sheet1
Figure 3A forest plot data for rs28383206					Figure 3B forest plot data for HLA DQA1*02:01
names	group	BETA	se		names	group	BETA	se
CHINA1	Asia	-0.634878	0.224581		RUSSIA	ITHGC	-0.141908	0.0387764
CHINA2	Asia	NA	NA		GERMANY	ITHGC	0.175094	0.153879
CHINA3	Asia	-0.127833	0.140025		CHINA1	ITHGC	-0.545413	0.196644
THAILAND	Asia	NA	NA		CHINA2	ITHGC	-0.24002	0.097082
JAPAN	Asia	NA	NA		GAMBIA	ITHGC	-0.0276032	0.113733
RUSSIA	Europe	-0.174353	0.0365053		GHANA	ITHGC	-0.0568591	0.087146
ESTONIA	Europe	-0.527633	0.133692		SAC1	ITHGC	0.137003	0.613987
GERMANY	Europe	0.0676587	0.144999		SAC2	ITHGC	-0.304084	0.208433
GAMBIA	Africa	0.173953	0.114814		Li et al	Other	0.24998	0.106691
GHANA	Africa	0.165514	0.0796258		Zheng et al	Other	-0.127833	0.130762
SAC1	Africa	NA	NA		Sveinbjornsson et al	Other	-0.198451	0.0585465
SAC2	Africa	-0.116534	0.191056
