# Supplementary material for: Multi-ancestry meta-analysis of host genetic susceptibility to tuberculosis identifies shared genetic architecture
Source: eLife. 2024 Jan 15;13:e84394. doi: 10.7554/eLife.84394 (PMC10789494; doi:10.7554/eLife.84394)
Supplement: Figure 4—source data 1. [file elife-84394-fig4-data1.xlsx]

## Sheet: Sheet1
Cohort	PC1	PC2
China1	-0.106377	0.0469603
China2	-0.099374	0.0368763
China3	-0.106056	0.046664
Thai	-0.0973693	0.0412024
Japan	-0.103761	0.0463947
Russia	-0.00507037	-0.11589
Estonia	-0.00277745	-0.123489
Germany	0.000360892	-0.118572
Gambia	0.160227	0.0551824
Ghana	0.169529	0.0623996
RSA_A	0.0931449	0.0103175
RSA_M	0.0975238	0.0119543
