# Supplementary material for: Multi-ancestry meta-analysis of host genetic susceptibility to tuberculosis identifies shared genetic architecture
Source: eLife. 2024 Jan 15;13:e84394. doi: 10.7554/eLife.84394 (PMC10789494; doi:10.7554/eLife.84394)
Supplement: Source data 1. [file elife-84394-data1.xlsx]

## Sheet: Sheet1 Readme
This readme file explains which results are presented in each sheet of the "ITHGC_Supplementary_Data20220903.xlsx" excel document
The supplementary data document contains raw results from which the figures and tables in the main manuscript and suppelemtary figures and tables were created.
The results presented in each sheet of hte docuemnt are:
Sheet 1 Readme: This readme file.
Sheet 2 SNP and gene list: List of Candidate genes and Candidate SNPs tested in this study.
Sheet 3 Candidate SNP MrMega: Association statistics for the candidate SNPs in the multi-ancestry MR-MEGA analysis.
Sheet 4 Canidate gene MrMega: Top association statistics for the SNPs from candidate genes in the multi-ancestry MR-MEGA analysis.
Sheet 5 Candidate SNP Europe: Association statistics for the candidate SNPs in the European ancestry specific GWAMA analysis.
Sheet 6 Candidate Gene Europe: Top association statistics for the SNPs from candidate genes in the European ancestry specific GWAMA analysis.
Sheet 7 Candidate SNP Asia: Association statistics for the candidate SNPs in the Asian ancestry specific GWAMA analysis.
Sheet 8 Candidate Gene Asia: Top association statistics for the SNPs from candidate genes in the Asian ancestry specific GWAMA analysis.
Sheet 9 Candidate SNP Africa: Association statistics for the candidate SNPs in the African ancestry specific GWAMA analysis.
Sheet 10 Candidate Gene Africa: Top association statistics for the SNPs from candidate genes in the African ancestry specific GWAMA analysis.
Sheet 11 HLA Trans-ethnic FE: Fixed effects trans-ethnic meta-analysis results for all HLA class I and II alleles including all 8 studies
Sheet 12 HLA Trans-ethnic FE cond: Fixed effects trans-ethnic meta-analysis results conditioned on the lead SNP (rs28383206) for all HLA class I and II alleles including all 6 studies in that have the lead SNP at MAF > 2.5%
Sheet 13 HLA Asia FE: Fixed effects Asian ancestry specific meta-analysis results for all HLA class I and II alleles
Sheet 14 HLA Africa FE: Fixed effects African ancestry specific meta-analysis results for all HLA class I and II alleles
Sheet 15 HLA Europe FE: Fixed effects European ancestry specific meta-analysis results for all HLA class I and II alleles
Sheet 16 HLA allele freq A: Allele frequencies for the class I HLA A gene in all cohorts
Sheet 17 HLA allele freq B: Allele frequencies for the class I HLA B gene in all cohorts
Sheet 18 HLA allele freq C: Allele frequencies for the class I HLA C gene in all cohorts
Sheet 19 HLA allele freq DPB1: Allele frequencies for the class II HLA DPB1 gene in all cohorts
Sheet 20 HLA allele freq DRB1: Allele frequencies for the class II HLA DRB1 gene in all cohorts
Sheet 21 HLA allele freq DQB1: Allele frequencies for the class II HLA DQB1 gene in all cohorts
Sheet 22 HLA allele freq DQA1: Allele frequencies for the class II HLA DQA1 gene in all cohorts

## Sheet: Sheet2 SNP and gene list
Sheet 2 SNP and gene list: List of Candidate genes and Candidate SNPs tested in this study.
Candidate genes		Candidate SNPs
AKT1		rs2273061
ALOX5		rs4461087
APOE		rs10515787
BTNL2		rs10497744
CARD8		rs1020941
CASP1		rs188872
CTSZ		rs10245298
CCL2		rs6985962
CCL3L1		rs1418267
CCL5		rs12437118
CCR2		rs6114027
CCR5		rs73226617
CD1A		rs2057178
CD14		rs4240897
CD40		rs41553512
CD209		rs2269497
CISH		rs4331426
C3		rs2335704
CTLA4		rs4733781
CXCL10		rs10956514
CXCL12		rs6071980
CYP3A5		rs358793
CYP2C19		rs17590261
DEFB1		rs6786408
EREG		rs916943
FCGR2A		rs3825435
FCGR3A		rs3110431
SLC40A1		rs9381416
FUT1		rs2326344
HP		rs571110
HSPA1A		rs17394081
HSP90AA1		rs7594926
IFITM3		rs2307058
IFNGR1		rs9682385
IFNG		rs9840514
NFKBIL1		rs9365798
IL1B		rs4348560
IL1R1		rs10738171
IL2		rs9787961
IL4		rs3019221
IL6		rs12716963
CXCL8		rs2057178
IL10RA		rs11031728
IL12RB1		rs11031731
IL17F
IL18
NOS2
IRF1
IRF8
IRGM
CR1
LTA4H
NR1H3
MARCO
MBL2
MC3R
MCL1
LY96
ABCB1
MICA
MIF
MMP1
MMP9
MRC1
MYD88
NAT1
CTDSP1
NLRP2
NOD2
SLC11A1
P2RX7
PACRG
PARK2
PTPN22
PTX3
SFTPA1
SIGIRR
SP110
TAPBP
TGFB1
TIRAP
TLR1
TLR2
TLR4
TLR6
TLR9
TLR10
TNF
TNFRSF1B
TCIRG1
TST
VDR
JAG1
DYNLRB2
EBF1
TMEFF2
CCL17
HAUS6
PENK
TXNDC4
ESRRB
TGM6
LINC02618
MFN2
HLA-DRB5
RGS12
PARD3B
ASAP1
FOXP1
AGMO
FARP1
OXR1
CLIC5
KLHL36
IGSF11
SRBD1
CDCA7
GBE1
GADL1
SPATA16
C6orf118
KIAA1432
DMRT2
CTR9
CCDC67
CDH13

## Sheet: Sheet3 Candidate SNP MrMega
																		Sheet 3 Candidate SNP MrMega: Association statistics for the candidate SNPs in the multi-ancestry MR-MEGA analysis.
V1	MarkerName	Chromosome	Position	EA	NEA	EAF	Nsample	Ncohort	Effects	beta_0	se_0	beta_1	se_1	beta_2	se_2	chisq_association	ndf_association	P.value_association	chisq_ancestry_het	ndf_ancestry_het	P.value_ancestry_het	chisq_residual_het	ndf_residual_het	P.value_residual_het	lnBF	Comments
rs4733781	rs4733781:131296767:A:C	8	131296767	C	A	0.357744	38266	12	+-++--+-+++-	-0.0316004	0.0249391	0.200272	0.273948	0.889244	0.278694	23.4736	3	3.21698e-05	12.8577	2	0.00161431	11.3234	9	0.254194	8.04759	NA
rs10497744	rs10497744:194490896:G:T	2	194490896	T	G	0.314362	38277	12	---+---+-+++	-0.0161924	0.0127337	0.0154277	0.132727	-0.0746238	0.146804	0.659334	3	0.882725	0.106686	2	0.948055	3.4829	9	0.942046	-3.39662	NA
rs2273061	rs2273061:10639543:G:A	20	10639543	A	G	0.498886	38210	12	+-+-+-++-+??	-0.0146498	0.0196292	0.0837632	0.195666	-0.0823014	0.224688	0.751663	3	0.86099	0.295933	2	0.86246	9.25852	9	0.413761	-3.35031	NA
rs4331426	rs4331426:20190795:G:A	18	20190795	A	G	0.895848	38277	12	---+---+++??	-0.0383937	0.0303106	0.376553	0.254129	-0.242473	0.376797	0.885741	3	0.828867	0.869068	2	0.647566	3.44034	9	0.944257	-3.28305	NA
rs916943	rs916943:15593768:C:T	7	15593768	T	C	0.0959734	31773	9	?+-??+---++-	0.032199	0.130653	-0.73042	1.24536	0.115231	1.19011	1.27108	3	0.736012	1.25867	2	0.532946	6.84246	6	0.335663	-2.65823	NA
rs358793	rs358793:55361433:T:C	3	55361433	C	T	0.535431	38249	12	+--+--+++-??	-0.0102038	0.0145508	0.0326399	0.141831	0.181766	0.169237	1.31001	3	0.726758	0.72361	2	0.696418	4.91323	9	0.841805	-3.07023	NA
rs10738171	rs10738171:1070591:T:C	9	1070591	C	T	0.624322	33889	9	??++++-?+-??	0.023466	0.0115458	-0.119105	0.116206	0.0644008	0.125255	1.32754	3	0.722603	0.308895	2	0.856889	1.56454	6	0.955093	-2.62991	NA
rs6985962	rs6985962:57434777:G:C	8	57434777	C	G	0.134108	38195	12	-+-+++---+--	0.0145621	0.0280391	0.0187726	0.269866	-0.294386	0.32984	1.47605	3	0.687808	0.819043	2	0.663968	8.96106	9	0.440877	-2.98693	NA
rs6114027	rs6114027:2379598:T:C	20	2379598	C	T	0.141395	36757	11	---?+-+++---	-0.0319471	0.0364579	0.0897879	0.333453	-0.170599	0.472519	1.60992	3	0.657143	0.31809	2	0.852958	15.2701	8	0.0541021	-2.78927	NA
rs188872	rs188872:57452165:A:G	16	57452165	G	A	0.741501	38257	12	+---++++-+??	-0.00909087	0.0298318	0.0939405	0.373289	-0.294153	0.269727	1.64855	3	0.648433	1.64099	2	0.440214	4.3272	9	0.888588	-2.90041	NA
rs12437118	rs12437118:76983730:G:A	14	76983730	A	G	0.340338	37682	11	---++++++-?+	-0.00208475	0.017863	-0.0123203	0.183759	-0.305463	0.201271	1.84206	3	0.605825	1.67894	2	0.43194	5.79541	8	0.670137	-2.67282	NA
rs17590261	rs17590261:136564124:T:C	4	136564124	C	T	0.152674	38259	12	+-+++++-----	0.00128029	0.039864	-0.419967	0.414447	-0.166114	0.392391	1.96291	3	0.58014	1.77643	2	0.41139	10.8204	9	0.288219	-2.74271	NA
rs4348560	rs4348560:5768609:C:T	9	5768609	T	C	0.460701	33879	9	??--+--?--??	-0.0233871	0.0128106	-0.100895	0.124147	0.0917241	0.143743	2.36962	3	0.499315	0.324148	2	0.850378	2.24908	6	0.895425	-2.10717	NA
rs17394081	rs17394081:45692947:C:T	2	45692947	T	C	0.281895	38271	12	++-++--+++++	0.0370448	0.0350647	0.00263597	0.339909	0.412187	0.339585	2.4023	3	0.493207	2.16922	2	0.338034	7.87179	9	0.547117	-2.52231	NA
rs10245298	rs10245298:53656669:T:C	7	53656669	C	T	0.903832	38242	12	-+--+--+-+??	-0.0177042	0.0349093	-0.12306	0.334084	0.567488	0.40198	3.63475	3	0.303701	2.37915	2	0.304351	10.7433	9	0.293714	-1.90407	NA
rs2326344	rs2326344:84668559:A:C	16	84668559	C	A	0.785594	26589	8	??++--??--??	0.0187803	0.0212582	-0.409122	0.179642	0.262565	0.292732	3.91396	3	0.270906	3.73055	2	0.154853	3.50032	5	0.623339	-1.15582	NA
rs4461087	rs4461087:79991016:T:G	16	79991016	G	T	0.710747	26559	8	??-+--??--??	-0.0239036	0.0202042	-0.202967	0.184274	0.387561	0.253826	4.03434	3	0.25778	2.27544	2	0.320549	3.8814	5	0.566615	-1.09544	NA
rs9365798	rs9365798:165295961:C:T	6	165295961	T	C	0.334904	36836	11	-+-?-+-+--++	-0.0138737	0.0192792	0.191207	0.191849	-0.478447	0.215705	4.52599	3	0.209984	4.4781	2	0.10656	6.84744	8	0.553179	-1.32649	NA
rs2307058	rs2307058:81586439:G:A	3	81586439	A	G	0.312866	38268	12	+---+-+++---	-0.0310767	0.0253721	0.173023	0.247138	0.190811	0.313865	4.8355	3	0.184246	1.68222	2	0.431231	15.7706	9	0.0718295	-1.30175	NA
rs4240897	rs4240897:12042755:G:A	1	12042755	A	G	0.49329	35938	9	?+-+----+-??	-0.0354565	0.039493	0.0626403	0.398156	0.101494	0.445944	4.84189	3	0.183748	0.339199	2	0.844003	24.5745	6	0.000409274	-0.867021	NA
rs6786408	rs6786408:71263218:A:C	3	71263218	C	A	0.597165	36714	11	+-+?+-++++??	0.0434409	0.02408	0.158865	0.234223	0.389846	0.254843	6.07139	3	0.108188	3.98624	2	0.13627	7.8987	8	0.443428	-0.551279	NA
rs11031728	rs11031728:32363616:C:G	11	32363616	G	C	0.13417	38246	12	----+-+++---	-0.0515263	0.0532228	0.0272251	0.497445	0.38595	0.577698	6.78181	3	0.0791872	1.70202	2	0.426984	21.4914	9	0.0106386	-0.325431	NA
rs73226617	rs73226617:141400653:G:A	3	141400653	A	G	0.0692426	28489	7	++?--+--????	-2.85446	3.82872	-35.4273	50.6717	-23.4893	30.8342	7.12913	3	0.0678938	7.15135	2	0.0279965	7.39668	4	0.116352	0.657291	NA
rs11031731	rs11031731:32365430:G:A	11	32365430	A	G	0.135685	38249	12	----+-+++---	-0.0575682	0.0540172	0.0736812	0.504881	0.337819	0.589133	7.14896	3	0.0672986	1.599	2	0.449555	22.8204	9	0.00661254	-0.14126	NA
rs2057178	rs2057178:32364187:G:A	11	32364187	A	G	0.134714	38253	12	----+-+++---	-0.0581796	0.0532018	0.0734721	0.497011	0.365346	0.581004	7.55077	3	0.0562681	1.82016	2	0.402492	22.1247	9	0.00849193	0.060302	NA
rs2057178	rs2057178:32364187:G:A	11	32364187	A	G	0.134714	38253	12	----+-+++---	-0.0581796	0.0532018	0.0734721	0.497011	0.365346	0.581004	7.55077	3	0.0562681	1.82016	2	0.402492	22.1247	9	0.00849193	0.060302	NA
rs2057178	rs2057178:32364187:G:A	11	32364187	A	G	0.134714	38253	12	----+-+++---	-0.0581796	0.0532018	0.0734721	0.497011	0.365346	0.581004	7.55077	3	0.0562681	1.82016	2	0.402492	22.1247	9	0.00849193	0.060302	NA
rs2057178	rs2057178:32364187:G:A	11	32364187	A	G	0.134714	38253	12	----+-+++---	-0.0581796	0.0532018	0.0734721	0.497011	0.365346	0.581004	7.55077	3	0.0562681	1.82016	2	0.402492	22.1247	9	0.00849193	0.060302	NA
rs2269497	rs2269497:3429856:A:G	4	3429856	G	A	0.0376026	37705	11	+-++-+++--?-	0.0374399	0.0743063	-1.22553	0.811153	-0.502569	0.884526	8.1966	3	0.0421186	4.608	2	0.0998585	15.891	8	0.0439663	0.514782	NA
rs10515787	rs10515787:158475211:C:T	5	158475211	T	C	0.130677	38277	12	-++++-+---++	-0.0646939	0.0653072	-0.950689	0.791096	0.650114	0.768676	8.64538	3	0.0343969	8.23892	2	0.0162533	14.72	9	0.0989208	0.609385	NA
rs6071980	rs6071980:38868576:T:C	20	38868576	C	T	0.181099	37740	11	-+++++++-+?-	0.0661433	0.0196604	-0.262169	0.199756	0.067609	0.247331	9.41525	3	0.0242503	1.10297	2	0.576094	4.72152	8	0.786884	1.12609	NA
rs10956514	rs10956514:131252758:A:G	8	131252758	G	A	0.405361	38270	12	+-++--+-+-+-	-0.0522361	0.0256296	0.0303349	0.261561	0.604594	0.299098	20.7498	3	0.000118654	7.1186	2	0.0284588	15.5067	9	0.0779246	6.68126	NA

## Sheet: Sheet 4 Candidate gene MrMega
	Sheet 4 Canidate gene MrMega: Top association statistics for the SNPs from candidate genes in the multi-ancestry MR-MEGA analysis.
MarkerName	Chromosome	Position	EA	NEA	EAF	Nsample	Ncohort	Effects	beta_0	se_0	beta_1	se_1	beta_2	se_2	chisq_association	ndf_association	P.value_association	chisq_ancestry_het	ndf_ancestry_het	P.value_ancestry_het	chisq_residual_het	ndf_residual_het	P.value_residual_het	lnBF	Comments	Gene
rs6913309:32339840:T:A	6	32339840	A	T	0.274231	31903	10	-?--?--+-+--	-0.114834	0.0592583	0.383004	0.565772	0.324284	0.596413	33.0259	3	3.18044e-07	6.1764	2	0.045584	22.1616	7	0.00238247	13.1128	NA	C6orf118
rs200554917:32461463:ACT:A	6	32461463	X	R	0.0418468	29235	7	+?+??++--+??	0.406025	0.10925	-3.16863	1.0569	2.28207	1.06425	32.1007	3	4.98385e-07	18.1968	2	0.000111846	7.70268	4	0.103097	13.1837	NA	C6orf118
rs41541115:32487241:G:A	6	32487241	A	G	0.0355334	29234	7	+?+??++--+??	0.401361	0.114201	-3.04401	1.12896	1.9228	1.10374	31.2927	3	7.37562e-07	14.3973	2	0.000747579	7.48313	4	0.112456	12.7784	NA	C6orf118
rs144861045:32490509:G:A	6	32490509	A	G	0.0322902	29236	7	+?+??++--+??	0.4211	0.104458	-2.96219	1.02206	2.01199	1.03234	30.9909	3	8.53812e-07	13.9629	2	0.00092897	6.207	4	0.184214	12.627	NA	C6orf118
rs28578990:32505643:A:G	6	32505643	G	A	0.0370945	29236	7	+?+??++---??	0.453103	0.138694	-4.016	1.339	2.32694	1.32302	33.2128	3	2.90434e-07	19.2953	2	6.45779e-05	8.57991	4	0.0725018	13.7415	NA	C6orf118
rs80234155:32512483:G:C	6	32512483	C	G	0.169475	29968	8	-?-??---++?+	-0.0938873	0.0332651	1.81488	0.318871	0.371077	0.328507	33.775	3	2.21011e-07	30.7771	2	2.07412e-07	2.39582	5	0.792096	13.8233	NA	C6orf118
rs113399573:32559159:C:T	6	32559159	T	C	0.226748	31391	9	-?-+?--+++?-	-0.0363206	0.0584039	0.904389	0.576257	0.908089	0.601374	31.3621	3	7.13149e-07	24.4474	2	4.9126e-06	19.4981	6	0.00340014	12.4362	NA	C6orf118
rs115752743:32559163:C:T	6	32559163	T	C	0.228137	29960	8	-?-??--+++?-	-0.0577598	0.0636707	1.09959	0.622285	0.720152	0.643969	33.3814	3	2.67599e-07	25.3007	2	3.20643e-06	16.8125	5	0.00486948	13.6258	NA	C6orf118
rs2647071:32573910:C:T	6	32573910	T	C	0.202114	31910	10	-?--?--+++-+	-0.10937	0.0759916	0.952311	0.726781	0.391584	0.738489	34.1929	3	1.80383e-07	17.792	2	0.000136933	23.6266	7	0.00132487	13.6982	NA	C6orf118
rs28383206:32575167:A:G	6	32575167	G	A	0.168059	29917	8	-?-??--+++?-	-0.12622	0.0907803	1.52821	0.872193	0.486807	0.864763	40.5202	3	8.26576e-09	24.3013	2	5.28484e-06	14.5531	5	0.0124526	17.2068	NA	C6orf118
rs28383310:32586930:G:A	6	32586930	A	G	0.195209	30474	9	-?-??--+++--	-0.0757017	0.0843009	1.01503	0.81337	0.59644	0.809384	31.5381	3	6.54815e-07	19.9034	2	4.76467e-05	21.4427	6	0.00152707	12.5245	NA	C6orf118
rs28383311:32587011:A:T	6	32587011	T	A	0.189626	31906	10	-?--?--+++--	-0.088252	0.0754043	1.12874	0.731006	0.480506	0.729996	32.9284	3	3.33459e-07	20.3887	2	3.73812e-05	22.3836	7	0.00218097	13.0639	NA	C6orf118
rs28383323:32594039:G:A	6	32594039	A	G	0.260092	31904	10	-?+-?--+++--	-0.0490582	0.0553696	0.915493	0.537796	0.743068	0.563995	36.3338	3	6.36495e-08	29.0143	2	5.00749e-07	22.4124	7	0.00215604	14.7721	NA	C6orf118
rs28680981:32606579:G:A	6	32606579	A	G	0.232371	30441	9	-?-??--+++--	-0.0634033	0.0662207	1.17161	0.638952	0.693025	0.640795	35.3983	3	1.00365e-07	26.8529	2	1.47558e-06	14.4596	6	0.0249032	14.4608	NA	C6orf118
rs141823983:32610948:AG:A	6	32610948	X	R	0.0390956	29237	7	+?+??++---??	0.304078	0.0948859	-3.44657	0.911249	1.4573	0.94038	31.8029	3	5.75859e-07	24.6059	2	4.53828e-06	6.77977	4	0.147994	13.0343	NA	C6orf118
rs2858331:32681277:A:G	6	32681277	G	A	0.48225	31926	10	-?+-?--+++-+	-0.0178039	0.02955	0.267422	0.288946	1.00538	0.315781	31.395	3	7.01887e-07	24.0511	2	5.98919e-06	10.9647	7	0.140167	12.2946	NA	C6orf118
rs17061034:47897727:T:C	8	47897727	C	T	0.0485079	21205	6	++?+-+?-????	-1.91557	4.43838	-26.7509	58.8346	-19.91	35.8628	31.3052	3	7.33132e-07	25.5929	2	2.77055e-06	8.68854	3	0.0337318	13.0158	NA	OXR1
rs4576509:23294037:C:G	9	23294037	G	C	0.767165	38208	12	+++++-----??	-0.0466417	0.0219317	-1.1825	0.243666	0.711174	0.21996	31.2843	3	7.40584e-07	22.6672	2	1.19642e-05	5.04254	9	0.830585	11.9656	NA	TXNDC4
rs4696852:8588218:G:T	4	8588218	T	G	0.697762	27974	6	??-??-+?++??	-0.0897021	0.0344611	0.390622	0.329001	0.851753	0.359245	33.4495	3	2.58893e-07	13.2253	2	0.00134324	3.40109	3	0.333819	14.0915	NA	TLR10

## Sheet: Sheet 5 Candidate SNP Europe
Sheet 5 Candidate SNP Europe: Association statistics for the candidate SNPs in the European ancestry specific GWAMA analysis.
V1	rs_number	reference_allele	other_allele	eaf	OR	OR_se	OR_95L	OR_95U	z	p.value	X_.log10_p.value	q_statistic	q_p.value	i2	n_studies	n_samples	effects
rs10956514	rs10956514:131252758:A:G	G	A	0.337227	0.88286	0.023799	0.836213	0.932108	-4.498554	6.96e-06	5.157534	7.039061	0.029613	0.715871	3	19650	-+-
rs4733781	rs4733781:131296767:A:C	C	A	0.293725	0.872799	0.024328	0.825116	0.923238	-4.746388	2.11e-06	5.67549	6.091372	0.047564	0.671667	3	19649	-+-
rs6786408	rs6786408:71263218:A:C	C	A	0.449439	0.997496	0.02585	0.946829	1.050874	-0.094269	0.924883	0.033913	3.123676	0.20975	0.359729	3	19650	-++
rs4331426	rs4331426:20190795:G:A	A	G	0.972252	0.989787	0.072073	0.848523	1.154569	-0.130656	0.89604	0.047673	1.78837	0.408941	0	3	19650	--+
rs2273061	rs2273061:10639543:G:A	A	G	0.431828	0.996389	0.025999	0.945432	1.050093	-0.135056	0.892561	0.049362	0.227106	0.892657	0	3	19650	-++
rs6114027	rs6114027:2379598:T:C	C	T	0.091714	0.992928	0.043583	0.907505	1.086391	-0.154634	0.877107	0.056947	0.079153	0.961196	0	3	19649	-++
rs2326344	rs2326344:84668559:A:C	C	A	0.91166	0.989862	0.047173	0.897404	1.091846	-0.203671	0.838619	0.076436	0	1	NA	1	11445	-??
rs10497744	rs10497744:194490896:G:T	T	G	0.304632	0.991244	0.027458	0.937427	1.048151	-0.308783	0.757521	0.120605	1.16295	0.559073	0	3	19650	--+
rs17394081	rs17394081:45692947:C:T	T	C	0.458488	0.986603	0.025527	0.936571	1.039308	-0.507951	0.611555	0.213565	1.388408	0.499472	0	3	19649	--+
rs916943	rs916943:15593768:C:T	T	C	0.133111	1.024621	0.040823	0.944608	1.111411	0.58632	0.557731	0.253575	1.503947	0.471435	0	3	19650	+--
rs10738171	rs10738171:1070591:T:C	C	T	0.564651	1.016498	0.027259	0.963071	1.072888	0.594009	0.552577	0.257607	0.358614	0.549277	0	2	18731	+-?
rs17590261	rs17590261:136564124:T:C	C	T	0.237362	1.025433	0.030451	0.965749	1.088806	0.820895	0.411767	0.385349	0.356959	0.836541	0	3	19650	++-
rs188872	rs188872:57452165:A:G	G	A	0.75831	1.026017	0.030385	0.966463	1.089241	0.841869	0.39992	0.398027	1.734654	0.420073	0	3	19650	+++
rs73226617	rs73226617:141400653:G:A	A	G	0.084675	1.049249	0.048332	0.954519	1.153381	0.995812	0.319389	0.49568	1.700838	0.427236	0	3	19649	+--
rs12437118	rs12437118:76983730:G:A	A	G	0.38545	1.032656	0.027999	0.977779	1.090614	1.153408	0.248782	0.604181	0.528204	0.767895	0	3	19650	+++
rs358793	rs358793:55361433:T:C	C	T	0.683307	0.967981	0.026466	0.916107	1.022792	-1.158047	0.246883	0.607508	2.6	0.272532	0.230769	3	19650	-++
rs4348560	rs4348560:5768609:C:T	T	C	0.397697	0.967121	0.025936	0.916287	1.020774	-1.213602	0.224937	0.64794	0.153719	0.695007	0	2	18731	--?
rs6985962	rs6985962:57434777:G:C	C	G	0.139241	1.054732	0.040859	0.974649	1.141395	1.322653	0.185986	0.730519	2.737313	0.254449	0.269356	3	19649	+--
rs2269497	rs2269497:3429856:A:G	G	A	0.029361	1.117762	0.081635	0.957758	1.304496	1.412423	0.157861	0.801724	3.311329	0.190965	0.396013	3	19649	+++
rs6071980	rs6071980:38868576:T:C	C	T	0.147546	1.062612	0.043614	0.977128	1.155574	1.419266	0.155858	0.807272	0.417834	0.811463	0	3	19649	+++
rs9365798	rs9365798:165295961:C:T	T	C	0.380229	1.041174	0.027011	0.988232	1.096953	1.515402	0.129708	0.887032	4.83452	0.089166	0.586308	3	19649	+-+
rs2307058	rs2307058:81586439:G:A	A	G	0.242872	0.948579	0.028301	0.893109	1.007493	-1.717166	0.085991	1.065547	7.493893	0.02359	0.733116	3	19650	-++
rs4461087	rs4461087:79991016:T:G	G	T	0.8367	0.933327	0.034481	0.865744	1.006186	-1.799195	0.072031	1.142479	0	1	NA	1	11445	-??
rs10245298	rs10245298:53656669:T:C	C	T	0.906092	0.919891	0.039117	0.843221	1.003532	-1.880595	0.060071	1.221334	0.425097	0.808521	0	3	19650	--+
rs4240897	rs4240897:12042755:G:A	A	G	0.500763	0.951615	0.024343	0.903903	1.001845	-1.88976	0.058834	1.23037	3.431376	0.17984	0.417143	3	19650	---
rs10515787	rs10515787:158475211:C:T	T	C	0.031091	0.861868	0.057677	0.748821	0.991982	-2.072222	0.038288	1.416936	1.952266	0.376765	0	3	19650	-+-
rs11031728	rs11031728:32363616:C:G	G	C	0.12903	0.912329	0.034505	0.8447	0.985372	-2.334999	0.01958	1.708178	5.890533	0.052588	0.660472	3	19649	-++
rs11031731	rs11031731:32365430:G:A	A	G	0.129082	0.91196	0.034489	0.844362	0.98497	-2.345403	0.019043	1.720262	5.935601	0.051416	0.66305	3	19650	-++
rs2057178	rs2057178:32364187:G:A	A	G	0.127444	0.908447	0.034487	0.840853	0.981475	-2.434009	0.014966	1.824892	5.402873	0.067109	0.629827	3	19650	-++
rs2057178	rs2057178:32364187:G:A	A	G	0.127444	0.908447	0.034487	0.840853	0.981475	-2.434009	0.014966	1.824892	5.402873	0.067109	0.629827	3	19650	-++
rs2057178	rs2057178:32364187:G:A	A	G	0.127444	0.908447	0.034487	0.840853	0.981475	-2.434009	0.014966	1.824892	5.402873	0.067109	0.629827	3	19650	-++
rs2057178	rs2057178:32364187:G:A	A	G	0.127444	0.908447	0.034487	0.840853	0.981475	-2.434009	0.014966	1.824892	5.402873	0.067109	0.629827	3	19650	-++
rs41553512	rs41553512:32486402:C:T	T	C	0.045534	1.163036	0.067399	1.030933	1.312066	2.455233	0.014112	1.850412	6.561042	0.037609	0.69517	3	19648	++-

## Sheet: Sheet 6 Candidate Gene Europe
Sheet 6 Candidate Gene Europe: Top association statistics for the SNPs from candidate genes in the European ancestry specific GWAMA analysis.
CHROMOSOME	POSITION	rs_number	reference_allele	other_allele	eaf	OR	OR_se	OR_95L	OR_95U	z	p.value	X_.log10_p.value	q_statistic	q_p.value	i2	n_studies	n_samples	effects	Gene	chr
11	7567605	rs11041435:7567605:A:G	G	A	0.055792	1.335269	0.07165	1.194834	1.492209	5.099652	3.48e-07	6.458199	0.892055	0.640166	0	3	19650	+++	CTR9	12
11	7571426	rs11041441:7571426:G:A	A	G	0.056026	1.345743	0.072331	1.203976	1.504204	5.228424	1.75e-07	6.756537	0.699045	0.705025	0	3	19649	+++	CTR9	12
11	7571932	rs11041442:7571932:C:T	T	C	0.056103	1.348674	0.072579	1.206418	1.507704	5.259698	1.48e-07	6.830045	0.680349	0.711646	0	3	19650	+++	CTR9	12
11	7574804	rs11041443:7574804:C:A	A	C	0.056146	1.347505	0.071761	1.206854	1.504548	5.302896	1.17e-07	6.932254	0.349706	0.839581	0	3	19649	+++	CTR9	12
11	7576666	rs11041444:7576666:G:C	C	G	0.056386	1.349461	0.072855	1.206666	1.509154	5.252146	1.54e-07	6.812255	0.480403	0.786469	0	3	19650	+++	CTR9	12
11	7579919	rs11041451:7579919:G:A	A	G	0.071162	1.297521	0.063067	1.173909	1.434148	5.099015	3.49e-07	6.456741	0.722906	0.696663	0	3	19649	+++	CTR9	12
6	32697405	rs111718686:32697405:T:C	C	T	0.203115	0.848918	0.026561	0.796858	0.904379	-5.07275	4.01e-07	6.396753	1.957715	0.37574	0	3	19649	---	C6orf118	61
11	7573173	rs12362545:7573173:G:T	T	G	0.0562	1.353582	0.072883	1.210732	1.513287	5.320563	1.06e-07	6.974282	0.627337	0.730761	0	3	19649	+++	CTR9	12
8	47897727	rs17061034:47897727:T:C	C	T	0.016865	1.673785	0.145141	1.389308	2.016511	5.4196	6.13e-08	7.212316	2.855403	0.091067	0.649787	2	12364	+?-	OXR1	65
1	14677072	rs191177369:14677072:G:C	C	G	0.005321	2.705731	0.441065	1.841244	3.976106	5.068259	4.11e-07	6.386525	6.041317	0.013975	0.834473	2	18731	++?	PTPN22	1
6	32729734	rs2008560:32729734:C:G	G	C	0.542147	0.874446	0.022687	0.829981	0.921294	-5.038713	4.79e-07	6.319444	0.821278	0.663226	0	3	19648	---	C6orf118	61
6	32788712	rs2621322:32788712:T:G	G	T	0.250757	0.858133	0.024793	0.809538	0.909644	-5.144122	2.75e-07	6.56044	1.42866	0.48952	0	3	19649	---	C6orf118	61
6	32573910	rs2647071:32573910:C:T	T	C	0.23662	0.854511	0.025108	0.805298	0.906731	-5.195246	2.09e-07	6.679005	14.673136	0.000651	0.863696	3	19650	--+	C6orf118	61
6	32575167	rs28383206:32575167:A:G	G	A	0.204303	0.828711	0.027901	0.774025	0.88726	-5.394333	7.06e-08	7.151195	10.370317	0.005599	0.807142	3	19649	--+	C6orf118	61
6	32791403	rs2856993:32791403:G:C	C	G	0.249858	0.857918	0.024825	0.809262	0.9095	-5.144384	2.75e-07	6.561044	1.535259	0.464112	0	3	19649	---	C6orf118	61
6	32787570	rs2857106:32787570:T:C	C	T	0.249576	0.858599	0.02484	0.809913	0.910212	-5.118736	3.15e-07	6.501974	1.642809	0.439813	0	3	19650	---	C6orf118	61
6	32681277	rs2858331:32681277:A:G	G	A	0.449826	0.873584	0.022422	0.829636	0.919859	-5.132056	2.93e-07	6.532617	6.632264	0.036293	0.698444	3	19650	--+	C6orf118	61
11	7573753	rs58809711:7573753:A:G	G	A	0.056175	1.352574	0.072864	1.20976	1.512246	5.304735	1.16e-07	6.936624	0.634946	0.727986	0	3	19649	+++	CTR9	12
11	7585106	rs61890220:7585106:G:A	A	G	0.07173	1.295201	0.062629	1.172449	1.430806	5.091668	3.63e-07	6.439931	0.551166	0.759129	0	3	19650	+++	CTR9	12
6	32339840	rs6913309:32339840:T:A	A	T	0.269726	0.858723	0.024232	0.811228	0.908997	-5.246853	1.59e-07	6.799804	11.710887	0.002864	0.829219	3	19649	--+	C6orf118	61
11	7568390	rs76827747:7568390:C:T	T	C	0.055951	1.343005	0.072044	1.201799	1.500802	5.203184	2.01e-07	6.697512	0.812952	0.665993	0	3	19649	+++	CTR9	12
11	7573499	rs77924639:7573499:C:T	T	C	0.056175	1.352545	0.072855	1.209748	1.512197	5.304885	1.16e-07	6.93698	0.636715	0.727343	0	3	19649	+++	CTR9	12
11	7565093	rs79165841:7565093:A:G	G	A	0.056113	1.341444	0.072244	1.199846	1.499752	5.161136	2.51e-07	6.599775	0.883931	0.642772	0	3	19648	+++	CTR9	12
11	7573588	rs79456496:7573588:C:T	T	C	0.056189	1.349161	0.072655	1.206757	1.50837	5.262262	1.46e-07	6.836088	0.607184	0.738162	0	3	19649	+++	CTR9	12
11	7573493	rs80282780:7573493:G:A	A	G	0.056175	1.352521	0.072855	1.209724	1.512174	5.304476	1.16e-07	6.936008	0.636971	0.72725	0	3	19649	+++	CTR9	12

## Sheet: Sheet 7 Candidate SNP Asia
Sheet 7 Candidate SNP Asia: Association statistics for the candidate SNPs in the Asian ancestry specific GWAMA analysis.
V1	rs_number	reference_allele	other_allele	eaf	OR	OR_se	OR_95L	OR_95U	z	p.value	X_.log10_p.value	q_statistic	q_p.value	i2	n_studies	n_samples	effects
rs41553512	rs41553512:32486402:C:T	T	C	0.027690	2.213250	0.352801	1.521760	3.218954	4.156884	3.53E-05	4.451657	0.000000	1.000000	#NAME?	1	2509	????+
rs6985962	rs6985962:57434777:G:C	C	G	0.102795	1.003221	0.048457	0.908246	1.108128	0.063377	0.949671	0.022427	3.750283	0.440855	0.000000	5	11349	++-+-
rs358793	rs358793:55361433:T:C	C	T	0.303374	0.995274	0.032421	0.931729	1.063152	-0.140738	0.888548	0.051319	1.484447	0.829393	0.000000	5	11350	+-+--
rs4348560	rs4348560:5768609:C:T	T	C	0.591930	0.990918	0.036386	0.919602	1.067765	-0.239404	0.811605	0.090655	2.103398	0.349344	0.049158	3	7890	-+??-
rs10245298	rs10245298:53656669:T:C	C	T	0.917768	1.022431	0.055406	0.913836	1.143931	0.387215	0.699878	0.154978	6.925054	0.139902	0.422387	5	11350	-+-+-
rs11031728	rs11031728:32363616:C:G	G	C	0.048665	0.971627	0.064771	0.844676	1.117658	-0.402916	0.688335	0.162200	11.283189	0.023559	0.645490	5	11349	-+---
rs4733781	rs4733781:131296767:A:C	C	A	0.603552	0.987270	0.030434	0.927620	1.050756	-0.402921	0.688332	0.162202	3.153553	0.532465	0.000000	5	11350	+-+-+
rs4461087	rs4461087:79991016:T:G	G	T	0.593939	1.016215	0.038411	0.940929	1.097525	0.409584	0.683456	0.165290	3.680855	0.158750	0.456648	3	7890	+-??-
rs916943	rs916943:15593768:C:T	T	C	0.008480	1.122881	0.241250	0.650031	1.939694	0.415561	0.679092	0.168071	0.413288	0.520305	0.000000	2	4899	???+-
rs12437118	rs12437118:76983730:G:A	A	G	0.286847	0.985672	0.032440	0.922089	1.053640	-0.424187	0.672814	0.172105	3.674756	0.451808	0.000000	5	11349	++---
rs17590261	rs17590261:136564124:T:C	C	T	0.058092	1.035431	0.066434	0.905221	1.184371	0.507787	0.613198	0.212399	8.962729	0.062038	0.553707	5	11350	+++-+
rs2057178	rs2057178:32364187:G:A	A	G	0.053193	0.958673	0.062755	0.835673	1.099777	-0.602442	0.548672	0.260687	12.551719	0.013687	0.681319	5	11349	-+---
rs2057178	rs2057178:32364187:G:A	A	G	0.053193	0.958673	0.062755	0.835673	1.099777	-0.602442	0.548672	0.260687	12.551719	0.013687	0.681319	5	11349	-+---
rs2057178	rs2057178:32364187:G:A	A	G	0.053193	0.958673	0.062755	0.835673	1.099777	-0.602442	0.548672	0.260687	12.551719	0.013687	0.681319	5	11349	-+---
rs2057178	rs2057178:32364187:G:A	A	G	0.053193	0.958673	0.062755	0.835673	1.099777	-0.602442	0.548672	0.260687	12.551719	0.013687	0.681319	5	11349	-+---
rs11031731	rs11031731:32365430:G:A	A	G	0.053172	0.958380	0.062739	0.835411	1.099450	-0.606760	0.545810	0.262959	12.579851	0.013522	0.682031	5	11350	-+---
rs17394081	rs17394081:45692947:C:T	T	C	0.036439	1.050359	0.078059	0.897364	1.229439	0.611710	0.542539	0.265569	3.133396	0.535755	0.000000	5	11350	++++-
rs10497744	rs10497744:194490896:G:T	T	G	0.414215	0.978413	0.030057	0.919500	1.041099	-0.688792	0.492885	0.307255	0.586401	0.964563	0.000000	5	11350	+----
rs2273061	rs2273061:10639543:G:A	A	G	0.636513	0.971657	0.030268	0.912333	1.034839	-0.894532	0.373148	0.428119	8.212887	0.084084	0.512961	5	11349	-++-+
rs4331426	rs4331426:20190795:G:A	A	G	0.972873	0.916124	0.081323	0.756732	1.109090	-0.898295	0.371140	0.430462	1.633255	0.802803	0.000000	5	11350	+----
rs6786408	rs6786408:71263218:A:C	C	A	0.851284	1.044081	0.046553	0.952836	1.144064	0.924547	0.357322	0.446940	4.809839	0.186263	0.376279	4	9918	?++-+
rs10956514	rs10956514:131252758:A:G	G	A	0.608512	0.970868	0.029942	0.912182	1.033329	-0.929368	0.354820	0.449992	4.476918	0.345293	0.106528	5	11350	+-+-+
rs10738171	rs10738171:1070591:T:C	C	T	0.624173	1.039064	0.039779	0.961097	1.123356	0.962910	0.337719	0.471444	0.149452	0.927998	0.000000	3	7890	++??+
rs6114027	rs6114027:2379598:T:C	C	T	0.159331	0.955000	0.041581	0.873502	1.044102	-1.011724	0.313797	0.503352	8.131194	0.043377	0.631050	4	9918	?+---
rs188872	rs188872:57452165:A:G	G	A	0.572808	0.968270	0.029713	0.910032	1.030235	-1.018818	0.310415	0.508057	1.962063	0.742736	0.000000	5	11350	-++--
rs4240897	rs4240897:12042755:G:A	A	G	0.524351	0.965427	0.030008	0.906611	1.028058	-1.097133	0.274687	0.561162	20.647332	1.25E-04	0.854703	4	10280	+-?+-
rs2307058	rs2307058:81586439:G:A	A	G	0.406723	0.959729	0.029053	0.902784	1.020265	-1.317134	0.189730	0.721864	5.554510	0.234979	0.279864	5	11350	-++--
rs9365798	rs9365798:165295961:C:T	T	C	0.273403	0.947784	0.034382	0.880396	1.020331	-1.425137	0.155928	0.807075	2.014925	0.569315	0.000000	4	9919	?--+-
rs2326344	rs2326344:84668559:A:C	C	A	0.704715	1.075297	0.042261	0.992467	1.165041	1.775100	0.077190	1.112440	3.197129	0.202187	0.374439	3	7890	+-??+
rs10515787	rs10515787:158475211:C:T	T	C	0.372796	1.062499	0.033245	0.997339	1.131916	1.877493	0.061606	1.210379	3.101176	0.541039	0.000000	5	11350	++-++
rs2269497	rs2269497:3429856:A:G	G	A	0.060021	1.150697	0.069766	1.013956	1.305879	2.174721	0.030399	1.517136	11.633304	0.020297	0.656160	5	11349	+-+-+
rs73226617	rs73226617:141400653:G:A	A	G	0.030612	0.784739	0.074091	0.639521	0.962931	-2.321802	0.020824	1.681435	6.797798	0.146967	0.411574	5	11349	--++-
rs6071980	rs6071980:38868576:T:C	C	T	0.256881	1.102006	0.037877	1.027767	1.181606	2.729718	0.006590	2.181099	3.636363	0.457449	0.000000	5	11349	++-++

## Sheet: Sheet 8 Candidate Gene Asia
Sheet 8 Candidate Gene Asia: Top association statistics for the SNPs from candidate genes in the Asian ancestry specific GWAMA analysis.
CHROMOSOME	POSITION	rs_number	reference_allele	other_allele	eaf	OR	OR_se	OR_95L	OR_95U	z	p.value	X_.log10_p.value	q_statistic	q_p.value	i2	n_studies	n_samples	effects	Gene	chr
6	32435381	6:32435381:T:C	C	T	0.024201	2.329521	0.348229	1.646993	3.294895	4.78063	1.97e-06	5.704946	0.016738	0.897059	0	2	3578	??+?+	C6orf118	59
6	32566612	6:32566612:T:C	C	T	0.031845	2.149253	0.295091	1.570876	2.940583	4.783723	1.94e-06	5.711563	0.034756	0.852108	0	2	3578	??+?+	C6orf118	59
6	32585128	6:32585128:T:A	A	T	0.032204	2.141645	0.290277	1.572702	2.916409	4.834158	1.51e-06	5.819995	0.079075	0.778555	0	2	3578	??+?+	C6orf118	59
6	32584069	rs111930050:32584069:T:C	C	T	0.032151	2.135081	0.28931	1.568033	2.907191	4.816171	1.65e-06	5.781203	0.064328	0.799782	0	2	3578	??+?+	C6orf118	59
6	32574199	rs112848051:32574199:C:T	T	C	0.031836	2.167235	0.297029	1.585058	2.96324	4.845959	1.43e-06	5.84552	0.037291	0.846873	0	2	3578	??+?+	C6orf118	59
6	32610310	rs113551974:32610310:C:T	T	C	0.033948	2.081234	0.276034	1.540208	2.812306	4.772078	2.06e-06	5.686676	0.321599	0.570648	0	2	3578	??+?+	C6orf118	59
6	32489949	rs1136744:32489949:G:A	A	G	0.027237	2.308488	0.336213	1.64951	3.230728	4.87846	1.21e-06	5.916112	0.031755	0.858567	0	2	3578	??+?+	C6orf118	59
6	32598403	rs114472823:32598403:G:C	C	G	0.041351	1.876395	0.218295	1.448537	2.430631	4.766379	2.12e-06	5.674518	1.873543	0.391891	0	3	5009	+?+?+	C6orf118	59
6	32504570	rs114538034:32504570:C:G	G	C	0.020237	2.841482	0.497732	1.865928	4.327081	4.866945	1.29e-06	5.891053	0.801738	0.370574	0	2	3579	??+?+	C6orf118	59
6	32490509	rs144861045:32490509:G:A	A	G	0.027129	2.279319	0.333113	1.626418	3.194317	4.784638	1.93e-06	5.71352	0.035607	0.850329	0	2	3579	??+?+	C6orf118	59
6	32555142	rs146049519:32555142:G:C	C	G	0.032589	2.169122	0.294493	1.591915	2.955616	4.905454	1.06e-06	5.97508	0.034735	0.852153	0	2	3578	??+?+	C6orf118	59
6	32490131	rs150158763:32490131:G:C	C	G	0.026966	2.284147	0.334956	1.627632	3.205471	4.777535	2e-06	5.698332	0.015493	0.900943	0	2	3579	??+?+	C6orf118	59
6	32602631	rs17205212:32602631:G:A	A	G	0.033925	2.068224	0.273633	1.531903	2.792312	4.744867	2.35e-06	5.628743	0.319749	0.571758	0	2	3578	??+?+	C6orf118	59
6	32449976	rs200953013:32449976:A:G	G	A	0.024444	2.281024	0.337652	1.619225	3.213308	4.716588	2.7e-06	5.568861	0.032858	0.856158	0	2	3579	??+?+	C6orf118	59
6	32505643	rs28578990:32505643:A:G	G	A	0.02359	2.665145	0.450199	1.782756	3.984281	4.778202	2e-06	5.699756	0.280608	0.596303	0	2	3578	??+?+	C6orf118	59
6	32557170	rs369917557:32557170:T:G	G	T	0.027626	2.390924	0.360293	1.684751	3.393095	4.880537	1.2e-06	5.92064	0.01458	0.90389	0	2	3579	??+?+	C6orf118	59
6	32562188	rs376144936:32562188:A:G	G	A	0.033472	2.167566	0.29499	1.589385	2.956074	4.887119	1.16e-06	5.934995	0.111109	0.738885	0	2	3578	??+?+	C6orf118	59
6	32453997	rs57294695:32453997:T:A	A	T	0.024406	2.283517	0.338172	1.620699	3.217406	4.720324	2.65e-06	5.576753	0.036587	0.848308	0	2	3579	??+?+	C6orf118	59
6	32454658	rs57640649:32454658:G:C	C	G	0.024993	2.295405	0.338525	1.631897	3.228687	4.773575	2.04e-06	5.689873	0.069402	0.79221	0	2	3579	??+?+	C6orf118	59
11	44545063	rs59979761:44545063:G:A	A	G	0.418327	0.81858	0.033417	0.753082	0.889773	-4.704807	2.86e-06	5.544012	3.23821	0.356336	0.073562	4	9918	?----	TIRAP	14
6	32538682	rs61321957:32538682:A:G	G	A	0.029374	2.268648	0.3304	1.621064	3.174928	4.777136	2.01e-06	5.697479	0.098506	0.75363	0	2	3578	??+?+	C6orf118	59
6	32454973	rs73401332:32454973:G:A	A	G	0.025991	2.265134	0.33188	1.61465	3.177675	4.734084	2.48e-06	5.605872	0.090096	0.764056	0	2	3578	??+?+	C6orf118	59
6	32459798	rs73401358:32459798:T:A	A	T	0.025868	2.302495	0.338446	1.639142	3.234305	4.810263	1.7e-06	5.768491	0.000249	0.98741	0	2	3579	??+?+	C6orf118	59
6	32469171	rs73403123:32469171:G:T	T	G	0.026931	2.31172	0.340394	1.644549	3.249554	4.823316	1.6e-06	5.796597	0.519275	0.471151	0	2	3578	??+?+	C6orf118	59
6	32611624	rs73409538:32611624:G:T	T	G	0.034376	2.088619	0.279369	1.541056	2.83074	4.747957	2.32e-06	5.635307	0.292385	0.588696	0	2	3578	??+?+	C6orf118	59
14	74297983	rs8006139:74297983:G:A	A	G	0.427838	0.857929	0.027003	0.805004	0.914333	-4.716821	2.7e-06	5.569353	8.792219	0.066508	0.545052	5	11349	--+--	HSP90AA1	19
6	32608762	rs80154958:32608762:T:C	C	T	0.034524	2.073654	0.272709	1.539145	2.793787	4.795445	1.83e-06	5.736669	0.306135	0.580062	0	2	3578	??+?+	C6orf118	59

## Sheet: Sheet 9 Candidate SNP Africa
Sheet 9 Candidate SNP Africa: Association statistics for the candidate SNPs in the African ancestry specific GWAMA analysis.
V1	rs_number	reference_allele	other_allele	eaf	OR	OR_se	OR_95L	OR_95U	z	p.value	X_.log10_p.value	q_statistic	q_p.value	i2	n_studies	n_samples	effects
rs6786408	rs6786408:71263218:A:C	C	A	0.635181	1.097083	0.042909	1.012981	1.188168	2.276943	0.022812	1.641845	0.009366	0.922901	0.000000	2	6009	??++
rs17394081	rs17394081:45692947:C:T	T	C	0.187842	1.070113	0.045824	0.980298	1.168156	1.515103	0.129737	0.886937	2.863837	0.413099	0.000000	4	7272	++++
rs2269497	rs2269497:3429856:A:G	G	A	0.023813	0.830163	0.096513	0.640998	1.075154	-1.410771	0.158297	0.800528	0.551926	0.758841	0.000000	3	6707	?---
rs17590261	rs17590261:136564124:T:C	C	T	0.071311	0.920243	0.059737	0.803158	1.054396	-1.197120	0.231239	0.635939	1.123170	0.771484	0.000000	4	7259	----
rs916943	rs916943:15593768:C:T	T	C	0.054289	0.919892	0.070504	0.781704	1.082509	-1.005392	0.314695	0.502110	4.677627	0.196983	0.358649	4	7224	+--+
rs4348560	rs4348560:5768609:C:T	T	C	0.473286	0.965831	0.035236	0.896769	1.040211	-0.918489	0.358356	0.445685	0.002800	0.957800	0.000000	2	6009	??--
rs11031731	rs11031731:32365430:G:A	A	G	0.282778	0.964685	0.036999	0.892168	1.043097	-0.901738	0.367191	0.435108	4.843318	0.183636	0.380590	4	7249	--+-
rs4461087	rs4461087:79991016:T:G	G	T	0.627562	0.965781	0.036309	0.894615	1.042609	-0.891548	0.372631	0.428721	0.049550	0.823848	0.000000	2	6009	??--
rs2057178	rs2057178:32364187:G:A	A	G	0.281951	0.965669	0.037006	0.893138	1.044091	-0.876926	0.380524	0.419618	4.737646	0.192047	0.366774	4	7254	--+-
rs2057178	rs2057178:32364187:G:A	A	G	0.281951	0.965669	0.037006	0.893138	1.044091	-0.876926	0.380524	0.419618	4.737646	0.192047	0.366774	4	7254	--+-
rs2057178	rs2057178:32364187:G:A	A	G	0.281951	0.965669	0.037006	0.893138	1.044091	-0.876926	0.380524	0.419618	4.737646	0.192047	0.366774	4	7254	--+-
rs2057178	rs2057178:32364187:G:A	A	G	0.281951	0.965669	0.037006	0.893138	1.044091	-0.876926	0.380524	0.419618	4.737646	0.192047	0.366774	4	7254	--+-
rs11031728	rs11031728:32363616:C:G	G	C	0.281989	0.966041	0.037017	0.893486	1.044487	-0.867330	0.385759	0.413684	4.799738	0.187063	0.374966	4	7248	--+-
rs2326344	rs2326344:84668559:A:C	C	A	0.653603	0.968071	0.036520	0.896492	1.045365	-0.827966	0.407692	0.389668	0.388034	0.533335	0.000000	2	6009	??--
rs10515787	rs10515787:158475211:C:T	T	C	0.021955	0.896743	0.104897	0.691144	1.163503	-0.820257	0.412072	0.385027	9.872309	0.019683	0.696120	4	7277	++--
rs6114027	rs6114027:2379598:T:C	C	T	0.252422	0.966357	0.039314	0.889302	1.050088	-0.807194	0.419559	0.377207	7.101386	0.068735	0.577547	4	7190	--+-
rs4733781	rs4733781:131296767:A:C	C	A	0.146927	1.035672	0.051689	0.934361	1.147969	0.667354	0.504563	0.297084	2.498973	0.475477	0.000000	4	7267	+-++
rs4240897	rs4240897:12042755:G:A	A	G	0.415705	0.981734	0.039403	0.904505	1.065558	-0.440987	0.659242	0.180955	0.493645	0.482306	0.000000	2	6008	??+-
rs6071980	rs6071980:38868576:T:C	C	T	0.151321	1.024054	0.055708	0.914866	1.146272	0.413205	0.679475	0.167827	0.508043	0.775675	0.000000	3	6742	?--+
rs12437118	rs12437118:76983730:G:A	A	G	0.298533	0.983958	0.042692	0.900282	1.075411	-0.356644	0.721370	0.141842	1.804117	0.405734	0.000000	3	6683	?++-
rs10956514	rs10956514:131252758:A:G	G	A	0.272359	0.987380	0.038116	0.912674	1.068202	-0.316390	0.751713	0.123948	3.632231	0.304013	0.174061	4	7270	+-+-
rs10497744	rs10497744:194490896:G:T	T	G	0.184894	0.987231	0.042743	0.903454	1.078776	-0.284048	0.776375	0.109928	1.747986	0.626319	0.000000	4	7277	++-+
rs4331426	rs4331426:20190795:G:A	A	G	0.521387	1.009254	0.036609	0.937500	1.086499	0.244804	0.806603	0.093340	0.023580	0.877960	0.000000	2	6009	??++
rs9365798	rs9365798:165295961:C:T	T	C	0.296303	0.991471	0.036462	0.920006	1.068488	-0.224409	0.822430	0.084901	0.168158	0.982558	0.000000	4	7268	++--
rs10738171	rs10738171:1070591:T:C	C	T	0.780243	1.008675	0.044263	0.921919	1.103596	0.188252	0.850665	0.070241	1.076844	0.299405	0.071361	2	6009	??+-
rs358793	rs358793:55361433:T:C	C	T	0.492500	1.006495	0.037050	0.933876	1.084760	0.169444	0.865430	0.062768	0.755364	0.384783	0.000000	2	6008	??+-
rs2273061	rs2273061:10639543:G:A	A	G	0.443266	0.993609	0.038388	0.918369	1.075014	-0.159577	0.873196	0.058888	0.735848	0.390994	0.000000	2	6007	??-+
rs6985962	rs6985962:57434777:G:C	C	G	0.169470	0.992554	0.045239	0.903885	1.089921	-0.156542	0.875587	0.057700	2.187646	0.534386	0.000000	4	7197	---+
rs2307058	rs2307058:81586439:G:A	A	G	0.355534	1.004917	0.035853	0.934646	1.080472	0.132618	0.894475	0.048432	2.874965	0.411308	0.000000	4	7268	--+-
rs10245298	rs10245298:53656669:T:C	C	T	0.873512	0.992973	0.053477	0.888157	1.110158	-0.123899	0.901375	0.045095	3.355326	0.066988	0.701966	2	6009	??-+
rs188872	rs188872:57452165:A:G	G	A	0.982017	0.985927	0.125341	0.740259	1.313123	-0.096934	0.922758	0.034912	0.528790	0.467116	0.000000	2	6008	??-+

## Sheet: Sheet 10 Candidate Gene Africa
Sheet 10 Candidate Gene Africa: Top association statistics for the SNPs from candidate genes in the African ancestry specific GWAMA analysis.
CHROMOSOME	POSITION	rs_number	reference_allele	other_allele	eaf	OR	OR_se	OR_95L	OR_95U	z	p.value	X_.log10_p.value	q_statistic	q_p.value	i2	n_studies	n_samples	effects	Gene	chr
12	70773203	12:70773203:C:G	G	C	0.029923	1.644384	0.160035	1.330715	2.031989	4.605899	4.17e-06	5.37992	1.833675	0.399781	0	3	6736	?+++	P2RX7	18
12	70774235	12:70774235:G:A	A	G	0.029913	1.645643	0.160173	1.331704	2.033591	4.612504	4.04e-06	5.39369	1.825863	0.401346	0	3	6737	?+++	P2RX7	18
8	8919227	8:8919227:T:C	C	T	0.020489	0.515214	0.064509	0.388777	0.68277	-4.616227	3.97e-06	5.401461	2.601146	0.106786	0.615554	2	6007	??--	OXR1	73
8	8919440	8:8919440:C:T	T	C	0.020499	0.515197	0.064507	0.388763	0.682751	-4.616376	3.96e-06	5.401772	2.599314	0.10691	0.615283	2	6009	??--	OXR1	73
6	37348242	rs111299137:37348242:C:T	T	C	0.019025	0.547863	0.063593	0.423221	0.709213	-4.56897	4.97e-06	5.303262	1.865605	0.600764	0	4	7267	----	C6orf118	67
5	54041270	rs114204347:54041270:A:G	G	A	0.013056	0.440505	0.06538	0.312361	0.62122	-4.674368	3e-06	5.523553	3.422355	0.180653	0.415607	3	6537	+?--	EBF1	63
8	8921933	rs181393949:8921933:A:T	T	A	0.019827	0.507776	0.064346	0.381657	0.675571	-4.65232	3.33e-06	5.477087	2.339917	0.126096	0.572634	2	6008	??--	OXR1	73
8	8919717	rs191199007:8919717:G:A	A	G	0.020079	0.514004	0.064997	0.386609	0.683377	-4.579903	4.72e-06	5.325899	2.723593	0.098875	0.632838	2	6008	??--	OXR1	73
8	8914443	rs191695775:8914443:A:G	G	A	0.018901	0.503054	0.064489	0.376655	0.67187	-4.653708	3.31e-06	5.480006	3.347142	0.067322	0.701238	2	6008	??--	OXR1	73
8	8921577	rs373685708:8921577:T:C	C	T	0.019805	0.507796	0.064359	0.381652	0.675634	-4.65119	3.35e-06	5.474711	2.335249	0.126475	0.57178	2	6009	??--	OXR1	73
20	5714932	rs6053639:5714932:C:T	T	C	0.040749	1.643349	0.155252	1.339055	2.016792	4.754575	2.02e-06	5.694301	0.584077	0.74674	0	3	6724	?+++	JAG1	45
1	65556775	rs6588110:65556775:C:T	T	C	0.752382	0.810656	0.035091	0.741877	0.885811	-4.640498	3.53e-06	5.452257	1.277965	0.258278	0.217506	2	6007	??--	PTPN22	1
9	17889636	rs7029867:17889636:G:A	A	G	0.038648	1.518636	0.127016	1.269685	1.8164	4.573805	4.86e-06	5.313266	1.738465	0.628416	0	4	7260	++++	TXNDC4	75
8	19559002	rs71510656:19559002:A:G	G	A	0.025759	0.572457	0.060823	0.453244	0.723027	-4.682163	2.88e-06	5.540031	3.82071	0.281486	0.214806	4	7244	----	OXR1	73
6	37338034	rs73423701:37338034:G:A	A	G	0.019527	0.54768	0.063075	0.424052	0.70735	-4.612536	4.04e-06	5.393758	2.026066	0.567014	0	4	7265	----	C6orf118	67
9	17881774	rs73642961:17881774:A:G	G	A	0.038537	1.524195	0.127244	1.274798	1.822384	4.623233	3.84e-06	5.416097	1.775472	0.620287	0	4	7258	++++	TXNDC4	75
5	54047233	rs79298537:54047233:G:A	A	G	0.012802	0.433738	0.064366	0.307581	0.611639	-4.763479	1.93e-06	5.713423	3.357201	0.186635	0.404266	3	6536	+?--	EBF1	63
17	4742307	rs9897835:4742307:T:C	C	T	0.189135	1.282217	0.062289	1.160131	1.41715	4.869574	1.14e-06	5.943814	0.341109	0.843197	0	3	6728	?+++	NOS2	30

[truncated: 12 more sheets: Sheet 11 HLA Trans-ethnic FE, Sheet 12 HLA Trans-ethnic cond, Sheet 13 HLA Asia FE, Sheet 14 HLA Africa FE, Sheet 15 HLA Europe FE, Sheet 16 HLA allele freq A, Sheet 17 HLA allele freq B, Sheet 18 HLA allele freq C, Sheet 19 HLA allele freq DPB1, Sheet 20 HLA allele freq DRB1, Sheet 21 HLA allele freq DQB1, Sheet 22 HLA allele freq DQA1]
